# Supplementary material for: The Two-Component Locus MSMEG_0244/0246 Together With MSMEG_0243 Affects Biofilm Assembly in M. smegmatis Correlating With Changes in Phosphatidylinositol Mannosides Acylation
Source: Front Microbiol. 2020 Sep 11;11:570606. doi: 10.3389/fmicb.2020.570606 (PMC7516205; doi:10.3389/fmicb.2020.570606)
Supplement: Supplementary file 2 [file Data_Sheet_2.xlsx]

## Sheet: Tabelle2
Organism	gene cluster of predicted "heme uptake region"
	gene 1	gene 2	gene 3	gene 4	gene 5	gene 6	gene 7	gene 8	gene 9	gene 10	gene 11	gene 12
mtu	Rv0201c	Rv0202c(K20466)	Rv0203(K20467)						Rv0204c(K20468)	Rv0205(K20469)	Rv0206c(K20470)	Rv0207c(K06860)
msm	MSMEG_0240	MSMEG_0241(K20466)	MSMEG_0242(K20467)	MSMEG_0243	MSMEG_0244	MSMEG_0246	MSMEG_0245	MSMEG_0247	MSMEG_0248(K20468)	MSMEG_0249(K20469)	MSMEG_0250(K20470)	MSMEG_0251(K06860)
mgo	AFA91_07985	AFA91_07990(K20466)	AFA91_07995(K20467)	AFA91_08000	AFA91_08005	AFA91_08010	AFA91_08015	AFA91_08020	AFA91_08025(K20468)	AFA91_08030(K20469)	AFA91_08035(K20470)	AFA91_08040(K06860)
mft	XA26_01900	XA26_01910(K20466)	XA26_01920(K20467)	XA26_01930	XA26_01940	XA26_01960	XA26_01970	XA26_01980	XA26_01990(K20468)	XA26_02000(K20469)	XA26_02010(K20470)	XA26_02020(K06860)
myv		G155_00955(K20466)	G155_00960(K20467)	G155_00965	G155_00970	G155_00975	G155_00980	G155_00985	G155_00990(K20468)	G155_00995(K20469)	G155_01000(K20470)	G155_01005(K06860)
msa	Mycsm_00128	Mycsm_00129(K20466)	Mycsm_00130(K20467)	Mycsm_00131	Mycsm_00132	Mycsm_00133	Mycsm_00134	Mycsm_00135	Mycsm_00136(K20468)	Mycsm_00137(K20469)	Mycsm_00138(K20470)	Mycsm_00139(K06860)
mrh	MycrhN_1545	MycrhN_1544(K20466)	MycrhN_1543(K20467)	MycrhN_1542	MycrhN_1541	MycrhN_1540	MycrhN_1539	MycrhN_1538	MycrhN_1537(K20468)	MycrhN_1536(K20469)	MycrhN_1534(K20470)	MycrhN_1533(K06860)
mphl	MPHLCCUG_04913	MPHLCCUG_04912(K20466)	MPHLCCUG_04911(K20467)	MPHLCCUG_04910	MPHLCCUG_04909	MPHLCCUG_04908	MPHLCCUG_04907		MPHLCCUG_04906(K20468)	MPHLCCUG_04905(K20469)	MPHLCCUG_04904(K20470)	MPHLCCUG_04903(K06860)
mll	B1R94_01305		B1R94_01315(K20467)	B1R94_01320	B1R94_01325	B1R94_01330	B1R94_01335		B1R94_01340(K20468)	B1R94_01345(K20469)	B1R94_01350(K20470)	B1R94_01355(K06860)
mdx	BTO20_35195		BTO20_35185(K20467)	BTO20_35180	BTO20_35175	BTO20_35170	BTO20_35165	BTO20_35160	BTO20_35155(K20468)	BTO20_35150(K20469)	BTO20_35145(K20470)	BTO20_35140(K06860)
mhas	MHAS_04014	MHAS_04013(K20466)	MHAS_04012(K20467)	MHAS_04011			MHAS_04010		MHAS_04009(K20468)	MHAS_04008(K20469)	MHAS_04007(K20470)	MHAS_04006(K06860)
mthn	4412656_00193	4412656_00194(K20466)	4412656_00195(K20467)	4412656_00196			4412656_00197		4412656_00198(K20468)	4412656_00199(K20469)	4412656_00200(K20470)	4412656_00201(K06860)
mcb	Mycch_0175	Mycch_0176(K20466)	Mycch_0177(K20467)	Mycch_0178	Mycch_0179	Mycch_0180	Mycch_0181		Mycch_0182(K20468)	Mycch_0183(K20469)	Mycch_0185(K20470)	Mycch_0186(K06860)
mye	AB431_01670	AB431_01675(K20466)	AB431_01680(K20467)	AB431_01685	AB431_01690	AB431_01695	AB431_01700		AB431_01705(K20468)	AB431_01720(K20469)	AB431_01725(K20470)	AB431_01730(K06860)
mne	D174_01415	D174_01410(K20466)	D174_01405(K20467)	D174_01310	D174_01400	D174_01395	D174_02765	D174_02770	D174_02775(K20468)	D174_02780(K20469)	D174_02785(K20470)	D174_02790(K06860)
myn	MyAD_01385	MyAD_01380(K20466)	MyAD_01375(K20467)	MyAD_01280	MyAD_01370	MyAD_01365	MyAD_02700	MyAD_02705	MyAD_02710(K20468)	MyAD_02715(K20469)	MyAD_02720(K20470)	MyAD_02725(K06860)
mjl	Mjls_0151	Mjls_0152(K20466)	Mjls_0153(K20467)	Mjls_0154	Mjls_0155	Mjls_0156	Mjls_0157		Mjls_0158(K20468)	Mjls_0159(K20469)	Mjls_0160(K20470)	Mjls_0161(K06860)
mmc	Mmcs_0161	Mmcs_0162(K20466)	Mmcs_0163(K20467)	Mmcs_0164	Mmcs_0165	Mmcs_0166	Mmcs_0167		Mmcs_0168(K20468)	Mmcs_0169(K20469)	Mmcs_0171(K20470)	Mmcs_0172(K06860)
mkm	Mkms_0170	Mkms_0171(K20466)	Mkms_0172(K20467)	Mkms_0173	Mkms_0174	Mkms_0175	Mkms_0176		Mkms_0177(K20468)	Mkms_0178(K20469)	Mkms_0180(K20470)	Mkms_0181(K06860)
mavu		RE97_00645(K20466)	RE97_00640(K20467)				RE97_19895		RE97_00635(K20468)	RE97_00630(K20469)		RE97_00620(K06860)
mao		MAP4_0137(K20466)	MAP4_0136(K20467)				MAP4_3995		MAP4_0135(K20468)	MAP4_0134(K20469)	MAP4_0133(K20470)	MAP4_0132(K06860)
mpa		MAP_3637c(K20466)	MAP_3638(K20467)				MAP_3880		MAP_3639c(K20468)	MAP_3640(K20469)	MAP_3641c(K20470)	MAP_3642c(K06860)
mid	MIP_07417	MIP_07415(K20466)	MIP_07413(K20467)				MIP_07076		MIP_07411(K20468)	MIP_07407(K20469)	MIP_07406(K20470)	MIP_07402(K06860)
mit	OCO_48990	OCO_48980(K20466)	OCO_48970(K20467)				OCO_46750		OCO_48960(K20468)	OCO_48940(K20469)	OCO_48930(K20470)	OCO_48920(K06860)
mmm	W7S_24520	W7S_24515(K20466)	W7S_24510(K20467)				W7S_23465		W7S_24505(K20468)	W7S_24500(K20469)	W7S_24495(K20470)	W7S_24490(K06860)
mia	OCU_48930	OCU_48920(K20466)	OCU_48910(K20467)				OCU_46480		OCU_48900(K20468)	OCU_48880(K20469)	OCU_48870(K20470)	OCU_48860(K06860)
mir	OCQ_49990	OCQ_49980(K20466)	OCQ_49970(K20467)				OCQ_47780		OCQ_49960(K20468)	OCQ_49950(K20469)	OCQ_49940(K20470)	OCQ_49930(K06860)
mhad	B586_01345	B586_01340(K20466)	B586_01335(K20467)	B586_01335(K20467)			B586_00355	B586_09750	B586_01330(K20468)	B586_01325(K20469)	B586_01320(K20470)	B586_01315(K06860)
mmal	CKJ54_23325	CKJ54_23320(K20466)	CKJ54_23315(K20467)				CKJ54_22235		CKJ54_23310(K20468)	CKJ54_23305(K20469)	CKJ54_23300(K20470)	CKJ54_23295(K06860)
mter	4434518_00151	4434518_00152(K20466)	4434518_00153(K20467)				4434518_00316		4434518_00154(K20468)	4434518_00155(K20469)	4434518_00156(K20470)	4434518_00157(K06860)
mvq	MYVA_0194	MYVA_0195(K20466)	MYVA_0196(K20467)	MYVA_0197	MYVA_0198	MYVA_0199	MYVA_0200	MYVA_0201	MYVA_0202(K20468)	MYVA_0204(K20469)	MYVA_0205(K20470)	MYVA_0206(K06860)
mlp	MLM_0408	MLM_0409(K20466)	MLM_0410(K20467)				MLM_3929		MLM_0411(K20468)	MLM_0412(K20469)	MLM_0413(K20470)	MLM_0414(K06860)
mmi	MMAR_0441	MMAR_0442(K20466)	MMAR_0443(K20467)	MMAR_3300			MMAR_0699	MMAR_3448	MMAR_0444(K20468)	MMAR_0445(K20469)	MMAR_0446(K20470)	MMAR_0447(K06860)
mmae	MMARE11_04050	MMARE11_04060(K20466)	MMARE11_04070(K20467)	MMARE11_32020			MMARE11_06480	MMARE11_33580	MMARE11_04080(K20468)	MMARE11_04090(K20469)	MMARE11_04100(K20470)	MMARE11_04110(K06860)
mul	MUL_1091	MUL_1092(K20466)	MUL_1093(K20467)	MUL_1329			MUL_2824	MUL_2722	MUL_1094(K20468)		MUL_1096(K20470)	MUL_1097(K06860)
mli	MULP_00433	MULP_00434(K20466)	MULP_00435(K20467)	MULP_03533			MULP_00698	MULP_03715	MULP_00436(K20468)	MULP_00437(K20469)	MULP_00438(K20470)	MULP_00439(K06860)
mva	Mvan_0187	Mvan_0188(K20466)	Mvan_0189(K20467)	Mvan_0190	Mvan_0191	Mvan_0192	Mvan_0193		Mvan_0194(K20468)	Mvan_0195(K20469)	Mvan_0196(K20470)	Mvan_0197(K06860)
mcv	BN43_10228	BN43_10229(K20466)	BN43_10231(K20467)	BN43_10231(K20467)			BN43_10433		BN43_10232(K20468)	BN43_10233(K20469)	BN43_10234(K20470)	BN43_10235(K06860)
mcx	BN42_10245	BN42_10246(K20466)	BN42_10247(K20467)	BN42_10247(K20467)			BN42_20121		BN42_10248(K20468)	BN42_10249(K20469)	BN42_10250(K20470)	BN42_10251(K06860)
mgi	Mflv_0465	Mflv_0464(K20466)	Mflv_0463(K20467)	Mflv_0462	Mflv_0461	Mflv_0460	Mflv_0459		Mflv_0458(K20468)	Mflv_0457(K20469)	Mflv_0456(K20470)	Mflv_0455(K06860)
msp	Mspyr1_02900	Mspyr1_02910(K20466)	Mspyr1_02920(K20467)	Mspyr1_02930	Mspyr1_02940	Mspyr1_02950	Mspyr1_02960		Mspyr1_02970(K20468)	Mspyr1_02980(K20469)	Mspyr1_02990(K20470)	Mspyr1_03000(K06860)
mshg	MSG_00387	MSG_00388(K20466)	MSG_00389(K20467)				MSG_00597		MSG_00390(K20468)	MSG_00391(K20469)	MSG_00392(K20470)	MSG_00393(K06860)
mtc	MT0211	MT0212(K20466)	MT0213(K20467)	MT0213(K20467)			MT0411		MT0214(K20468)	MT0215(K20469)	MT0216(K20470)	MT0217(K06860)
mtx	M943_01080	M943_01085(K20466)	M943_01090(K20467)	M943_01090(K20467)			M943_02080		M943_01095(K20468)	M943_01100(K20469)	M943_01105(K20470)	M943_01110(K06860)
mtf	TBFG_10203	TBFG_10204(K20466)	TBFG_10205(K20467)	TBFG_10205(K20467)			TBFG_10406		TBFG_10206(K20468)	TBFG_10207(K20469)	TBFG_10208(K20470)	TBFG_10209(K06860)
mtut	HKBT1_0217	HKBT1_0218(K20466)	HKBT1_0219(K20467)	HKBT1_0219(K20467)			HKBT1_0416		HKBT1_0220(K20468)	HKBT1_0221(K20469)	HKBT1_0222(K20470)	HKBT1_0223(K06860)
mtb	TBMG_00202	TBMG_00203(K20466)	TBMG_00204(K20467)	TBMG_00204(K20467)			TBMG_00402		TBMG_00205(K20468)	TBMG_00206(K20469)	TBMG_00207(K20470)	TBMG_00208(K06860)
mtl	CCDC5180_0184	CCDC5180_0185(K20466)	CCDC5180_0186(K20467)	CCDC5180_0186(K20467)			CCDC5180_0371		CCDC5180_0187(K20468)	CCDC5180_0188(K20469)	CCDC5180_0189(K20470)	CCDC5180_0190(K06860)
mtn	ERDMAN_0228	ERDMAN_0229(K20466)	ERDMAN_0230(K20467)	ERDMAN_0230(K20467)			ERDMAN_0442		ERDMAN_0231(K20468)	ERDMAN_0232(K20469)	ERDMAN_0233(K20470)	ERDMAN_0234(K06860)
mcq	BN44_10235	BN44_10236(K20466)	BN44_10237(K20467)	BN44_10237(K20467)			BN44_10442		BN44_10238(K20468)	BN44_10239(K20469)	BN44_10240(K20470)	BN44_10241(K06860)
mtur	CFBS_0217	CFBS_0218(K20466)	CFBS_0219(K20467)	CFBS_0219(K20467)			CFBS_0416		CFBS_0220(K20468)	CFBS_0221(K20469)	CFBS_0222(K20470)	CFBS_0223(K06860)
maf	MAF_02020	MAF_02030(K20466)	MAF_02040(K20467)	MAF_02040(K20467)			MAF_04030		MAF_02050(K20468)	MAF_02060(K20469)	MAF_02070(K20470)	MAF_02080(K06860)
mce	MCAN_02071	MCAN_02081(K20466)	MCAN_02091(K20467)	MCAN_02091(K20467)			MCAN_03991		MCAN_02101(K20468)	MCAN_02111(K20469)	MCAN_02121(K20470)	MCAN_02131(K06860)
mte	CCDC5079_0186	CCDC5079_0187(K20466)	CCDC5079_0188(K20467)	CCDC5079_0188(K20467)			CCDC5079_0375		CCDC5079_0189(K20468)	CCDC5079_0190(K20469)	CCDC5079_0191(K20470)	CCDC5079_0192(K06860)
mra	MRA_0209	MRA_0210(K20466)	MRA_0211(K20467)	MRA_0211(K20467)			MRA_0407		MRA_0212(K20468)	MRA_0213(K20469)	MRA_0214(K20470)	MRA_0215(K06860)
mtub	MT7199_0205	MT7199_0206(K20466)	MT7199_0207(K20467)	MT7199_0207(K20467)			MT7199_0406		MT7199_0208(K20468)	MT7199_0209(K20469)	MT7199_0210(K20470)	MT7199_0211(K06860)
mtq	HKBS1_0217	HKBS1_0218(K20466)	HKBS1_0219(K20467)	HKBS1_0219(K20467)			HKBS1_0416		HKBS1_0220(K20468)	HKBS1_0221(K20469)	HKBS1_0222(K20470)	HKBS1_0223(K06860)
mmic	RN08_0231	RN08_0232(K20466)	RN08_0233(K20467)	RN08_0233(K20467)			RN08_0452		RN08_0234(K20468)	RN08_0235(K20469)	RN08_0236(K20470)	RN08_0237(K06860)
mtj	J112_01105	J112_01110(K20466)	J112_01115(K20467)	J112_01115(K20467)			J112_02140		J112_01120(K20468)	J112_01125(K20469)	J112_01130(K20470)	J112_01135(K06860)
mtz	TBXG_000203	TBXG_000204(K20466)	TBXG_000205(K20467)	TBXG_000205(K20467)			TBXG_000400		TBXG_000206(K20468)	TBXG_000207(K20469)	TBXG_000208(K20470)	TBXG_000209(K06860)
mtg	MRGA327_01270	MRGA327_01275(K20466)	MRGA327_01280(K20467)	MRGA327_01280(K20467)			MRGA327_02535		MRGA327_01285(K20468)	MRGA327_01290(K20469)	MRGA327_01295(K20470)
mtk	TBSG_00204	TBSG_00205(K20466)	TBSG_00206(K20467)	TBSG_00206(K20467)			TBSG_00405		TBSG_00207(K20468)	TBSG_00208(K20469)	TBSG_00209(K20470)	TBSG_00210(K06860)
mtul	TBHG_00201	TBHG_00202(K20466)	TBHG_00203(K20467)	TBHG_00203(K20467)			TBHG_00395		TBHG_00204(K20468)	TBHG_00205(K20469)	TBHG_00206(K20470)	TBHG_00207(K06860)
mtv	RVBD_0201c	RVBD_0202c(K20466)	RVBD_0203(K20467)	RVBD_0203(K20467)			RVBD_0401		RVBD_0204c(K20468)	RVBD_0205(K20469)	RVBD_0206c(K20470)	RVBD_0207c(K06860)
mto	MTCTRI2_0205	MTCTRI2_0206(K20466)	MTCTRI2_0207(K20467)	MTCTRI2_0207(K20467)			MTCTRI2_0404		MTCTRI2_0208(K20468)	MTCTRI2_0209(K20469)	MTCTRI2_0210(K20470)	MTCTRI2_0211(K06860)
mbo	BQ2027_MB0207C	BQ2027_MB0208C(K20466)	BQ2027_MB0209(K20467)	BQ2027_MB0209(K20467)			BQ2027_MB0407		BQ2027_MB0210C(K20468)	BQ2027_MB0211(K20469)	BQ2027_MB0212C(K20470)	BQ2027_MB0213C(K06860)
mtuu	HKBT2_0217	HKBT2_0218(K20466)	HKBT2_0219(K20467)	HKBT2_0219(K20467)			HKBT2_0416		HKBT2_0220(K20468)	HKBT2_0221(K20469)	HKBT2_0222(K20470)	HKBT2_0223(K06860)
mtd	UDA_0201c	UDA_0202c(K20466)	UDA_0203(K20467)	UDA_0203(K20467)			UDA_0401		UDA_0204c(K20468)	UDA_0205(K20469)	UDA_0206c(K20470)	UDA_0207c(K06860)
mbx	BCGT_4003	BCGT_4004(K20466)	BCGT_4005(K20467)	BCGT_4005(K20467)			BCGT_0171		BCGT_4006(K20468)	BCGT_4007(K20469)	BCGT_4008(K20470)	BCGT_4009(K06860)
mbk	K60_002220	K60_002230(K20466)	K60_002240(K20467)	K60_002240(K20467)			K60_004210		K60_002250(K20468)	K60_002260(K20469)	K60_002270(K20470)	K60_002280(K06860)
mbm	BCGMEX_0207c	BCGMEX_0208c(K20466)	BCGMEX_0209(K20467)	BCGMEX_0209(K20467)			BCGMEX_0409		BCGMEX_0210c(K20468)	BCGMEX_0211(K20469)	BCGMEX_0212c(K20470)	BCGMEX_0213c(K06860)
mbb	BCG_0238c	BCG_0239c(K20466)	BCG_0240(K20467)	BCG_0240(K20467)			BCG_0438		BCG_0241c(K20468)	BCG_0242(K20469)	BCG_0243c(K20470)	BCG_0244c(K06860)
mbt	JTY_0207	JTY_0208(K20466)	JTY_0209(K20467)	JTY_0209(K20467)			JTY_0408		JTY_0210(K20468)	JTY_0211(K20469)	JTY_0212(K20470)	JTY_0213(K06860)
mcz	BN45_10223	BN45_10224(K20466)	BN45_10225(K20467)	BN45_10225(K20467)			BN45_10439		BN45_10226(K20468)	BN45_10227(K20469)	BN45_10228(K20470)	BN45_10229(K06860)
mche	BB28_23115	BB28_23110(K20466)	BB28_23105(K20467)		BB28_10025	BB28_10030	BB28_23095		BB28_23085(K20468)	BB28_23070(K20469)	BB28_23005(K20470)	BB28_23000(K06860)
msao	MYCSP_21090	MYCSP_21085(K20466)	MYCSP_21080(K20467)	MYCSP_07275	MYCSP_08385	MYCSP_08390	MYCSP_21075		MYCSP_21065(K20468)	MYCSP_21050(K20469)	MYCSP_20965(K20470)	MYCSP_20960(K06860)
mste	MSTE_04697	MSTE_04696(K20466)	MSTE_04695(K20467)		MSTE_01863	MSTE_01864	MSTE_04693		MSTE_04691(K20468)	MSTE_04688(K20469)	MSTE_04669(K20470)	MSTE_04668(K06860)
mab	MAB_4530	MAB_4529(K20466)	MAB_4528c(K20467)	MAB_1608c	MAB_1926	MAB_1927	MAB_4526		MAB_4524(K20468)	MAB_4521c(K20469)	MAB_4508(K20470)	MAB_4507(K06860)
mabb	MASS_4556	MASS_4555(K20466)	MASS_4554(K20467)		MASS_1914	MASS_1915	MASS_4552		MASS_4550(K20468)	MASS_4547(K20469)	MASS_4530(K20470)	MASS_4529(K06860)
mmv	MYCMA_03735	MYCMA_2505(K20466)	MYCMA_03740(K20467)		MYCMA_1000	MYCMA_1001	MYCMA_03750		MYCMA_03755(K20468)	MYCMA_2501(K20469)	MYCMA_2497(K20470)	MYCMA_03805(K06860)
miz	BAB75_25590	BAB75_25585(K20466)	BAB75_25580(K20467)		BAB75_10505	BAB75_10510	BAB75_25570		BAB75_25560(K20468)	BAB75_25545(K20469)	BAB75_25460(K20470)	BAB75_25455(K06860)
